# Supplementary material
Source: MDPI journal article supplement (https://www.mdpi.com/2077-0472/11/9/883)
Supplement: s1 [file s1]

## Supplementary materials

The supplementary materials include results of genotyped population of sorghum, table S 1 shows results of BC<sub>2</sub>F<sub>1</sub> sorghum populations scored with heterozygous allele using SNP markers and table S 2 shows results of Genotypes of BC<sub>2</sub>F<sub>3</sub> populations scored by favourable allele using SNP markers

Table S 1: BC<sub>2</sub>F<sub>1</sub> sorghum populations scored with heterozygous alleles using SNP markers

| NS                                            | SNP markers | H. Allele | DP<br>alleles | RP<br>alleles | NS                                           | SNP markers | H.<br>Allele | DP<br>alleles | RP<br>alleles |
|-----------------------------------------------|-------------|-----------|---------------|---------------|----------------------------------------------|-------------|--------------|---------------|---------------|
| BC <sub>2</sub> F <sub>1</sub> (B35*Wahi)     |             |           |               |               | BC <sub>2</sub> F <sub>1</sub> (B35*Seguifa) |             |              |               |               |
| 22                                            | snpSB0102   | G/A       | AA            | GA            | 418                                          | snpSB0072   | A/G          | GG            | AA            |
| 44                                            | snpSB0103   | G/C       | CC            | CC            | 441                                          | snpSB0072   | A/G          | GG            | AA            |
| 59                                            | snpSB0103   | G/C       | CC            | CC            | 463                                          | snpSB0072   | A/G          | GG            | AA            |
| 70                                            | snpSB0103   | G/C       | CC            | CC            | 566                                          | snpSB0072   | A/G          | GG            | AA            |
| 82                                            | snpSB0102   | G/A       | AA            | GA            | 567                                          | snpSB0103   | G/C          | CC            | CC            |
| 90                                            | snpSB0102   | G/A       | AA            | GA            | 569                                          | snpSB0103   | G/C          | CC            | CC            |
| 94                                            | snpSB0102,  | G/A,      | AA,           | GA,           | 581                                          | snpSB0103   | G/C          | CC            | CC            |
|                                               | snpSB0103   | G/C       | CC            | CC            | 582                                          | snpSB0103   | G/C          | CC            | CC            |
| BC <sub>2</sub> F <sub>1</sub> (S35*Hakika)   |             |           |               |               | BC <sub>2</sub> F <sub>1</sub> (S35*Pato)    |             |              |               |               |
| 111                                           | snpSB0103   | G/C       | CC            | CC            | 586                                          | snpSB0103   | G/C          | CC            | CC            |
| 117                                           | snpSB0103   | G/C       | CC            | CC            | 589                                          | snpSB0102,  | G/A,         | A,            |               |
| 125                                           | snpSB0103   | G/C       | CC            | CC            |                                              | snpSB0103   | G/C          | CC            |               |
| 127                                           | snpSB0103   | G/C       | CC            | CC            | 595                                          | snpSB0049,  | G/A,         | GG,           | AA,           |
| 128                                           | snpSB0103   | G/C       | CC            | CC            |                                              | snpSB0102   | C/T          | AA            | AA            |
| 131                                           | snpSB0102,  | G/A,      | AA,           | GA,           | 601                                          | snpSB0103   | G/C          | CC            | CC            |
|                                               | snpSB0103   | G/C       | CC            | CC            | 606                                          | snpSB0049   | G/A          | GG            | AA,           |
| 138                                           | snpSB0103   | G/C       | CC            | CC            | 610                                          | snpSB0049,  | G/A,         | GG,           | CC            |
| 157                                           | snpSB0103   | G/C       | CC            | CC            |                                              | snpSB0103   | G/C          | CC            |               |
| BC <sub>2</sub> F <sub>1</sub> (NACO Mtama 1) |             |           |               |               | 624                                          | snpSB0102   | G/A          | AA            | AA            |
| 175                                           | snpSB0102   | G/A       | AA            | AA            | 625                                          | snpSB0103   | G/C          | CC            | CC            |
| 190                                           | snpSB0102   | G/A       | AA            | AA            | 631                                          | snpSB0102   | G/A          | AA            | AA            |
| 207                                           | snpSB0102   | G/A       | AA            | AA            | 634                                          | snpSB0102   | G/A          | AA            | AA            |
| 210                                           | snpSB0103   | G/C       | CC            | CC            | 637                                          | snSB0102,   | G/A,         | AA,           | AA,           |
| 213                                           | snpSB0103   | G/C       | CC            | CC            |                                              | snpSB0103   | G/C          | GG            | CC            |
| 241                                           | snpSB0102,  | G/A,      | AA,           | AA            | 638                                          | snpSB0102   | G/A          | AA            | AA            |
|                                               | snpSB0103   | G/C       | CC            |               | 639                                          | snpSB0102,  | G/A,         | AA,           | AA,           |
| 255                                           | snpSB0102   | G/A       | AA            | AA            |                                              | snpSB0103   | G/C          | GG            | CC            |
| 266                                           | snpSB0103   | G/C       | CC            | CC            | 640                                          | snpSB0103   | G/C          | CC            | CC            |
| 272                                           | snpSB0103   | G/C       | CC            | CC            | 644                                          | snpSB0103   | G/C          | CC            | CC            |
| 276                                           | snpSB0103   | G/C       | CC            | CC            | 645                                          | snpSB0102   | G/A          | AA            | AA            |
| 284                                           | snpSB0103   | G/C       | CC            | CC            | 647                                          | snpSB0103   | G/C          | CC            | CC            |

|                                             |            |      |     |     |     |            |         |     |     |
|---------------------------------------------|------------|------|-----|-----|-----|------------|---------|-----|-----|
| 304                                         | snpSB0102  | G/A  | AA  | AA  | 656 | snpSB0103  | G/C     | CC  | CC  |
| 307                                         | snpSB0102, | G/A, | AA, | AA, | 659 | snpSB0102  | G/A     | AA  | AA  |
|                                             | snpSB0103  | G/C  | CC  | CC  | 661 | snpSB0102, | G/A,    | AA, | A,  |
| 319                                         | snpSB0103  | G/C  | CC  | CC  |     | snpSB0103  | G/C     | CC  | CC  |
| 320                                         | snpSB0103  | G/C  | CC  | CC  | 663 | snpSB0103  | G/C     | CC  | CC  |
| BC <sub>2</sub> F <sub>1</sub> (B35* Macia) |            |      |     |     | 668 | snpSB0103  | C/T,G/C | CC  | CC  |
| 347                                         | snpSB0103  | G/C  | CC  | CC  | 671 | snpSB0103  | G/C     | CC  | CC  |
| 348                                         | snpSB0102, | G/A, | AA, | AA, | 679 | snpSB0103  | G/C     | CC  | CC  |
|                                             | snpSB0103  | G/C  | CC  | CC  | 681 | snpSB0103  | G/C     | CC  | CC  |
| 352                                         | snpSB0103  | G/C  | CC  | CC  | 685 | snpSB0102, | G/A,    | AA, | AA, |
| 391                                         | snpSB0103  | G/C  | CC  | CC  |     | snpSB0103  | G/C     | CC  | CC  |
| 395                                         | snpSB0103  | G/C  | CC  | CC  | 703 | snpSB0102  | G/A     | AA  | AA  |
|                                             |            |      |     |     | 725 | snpSB0102  | G/A     | AA  | AA  |

H-Heterozygous, DP-Donor parent, NS-Number of sample, RP-Recurrent parent

Table S 2: Genotypes of BC<sub>2</sub>F<sub>3</sub> populations scored by favourable alleles using SNP markers

| Genotype                                  | SNP markers | FA | No. of FA | Genotype                                     | SNP markers | FA | No. of FA |
|-------------------------------------------|-------------|----|-----------|----------------------------------------------|-------------|----|-----------|
| BC <sub>2</sub> F <sub>3</sub> (B35*NACO) |             |    |           | BC <sub>2</sub> F <sub>3</sub> (B35*Seguifa) |             |    |           |
| NA241A                                    | snSB00049   | GG | 115       | SE408                                        | snSB00049   | GG | 55        |
|                                           | snSB00053   | AA | 122       |                                              | snSB00053   | AA | 55        |
|                                           | snSB00054   | GG | 124       |                                              | snSB00054   | GG | 55        |
|                                           | snSB00072   | AA | 6         |                                              | snSB00089   | CC | 73        |
|                                           | snSB00089   | CC | 124       |                                              | snSB00101   | CC | 73        |
|                                           | snSB00101   | CC | 124       |                                              | snSB000102  | AA | 73        |
|                                           | snSB000102  | AA | 123       | SE438                                        | snSB00049   | GG | 23        |
| NA241B                                    | snSB00049   | GG | 113       |                                              | snSB00053   | AA | 51        |
|                                           | snSB00053   | AA | 122       |                                              | snSB00054   | GG | 51        |
|                                           | snSB00054   | GG | 122       |                                              | snSB00072   | AA | 26        |
|                                           | snSB00072   | AA | 4         |                                              | snSB00089   | CC | 52        |
|                                           | snSB00089   | CC | 122       |                                              | snSB00101   | CC | 52        |
|                                           | snSB00101   | CC | 122       |                                              | snSB000102  | AA | 52        |
|                                           | snSB000102  | AA | 122       |                                              |             |    |           |

|                                       |            |    |     |                                  |            |    |   |
|---------------------------------------|------------|----|-----|----------------------------------|------------|----|---|
| NA316A                                | snSB00049  | GG | 116 | Seguifa<br>(Recurrent<br>Parent) | snSB00049  | GG | 3 |
|                                       | snSB00053  | AA | 120 |                                  | snSB00053  | AA | 3 |
|                                       | snSB00054  | GG | 120 |                                  | snSB00054  | GG | 3 |
|                                       | snSB00072  | AA | 2   |                                  | snSB00089  | CC | 3 |
|                                       | snSB00089  | CC | 121 |                                  | snSB00101  | CC | 3 |
|                                       | snSB00101  | CC | 121 |                                  | snSB000102 | AA | 3 |
|                                       | snSB000102 | AA | 121 |                                  |            |    |   |
| NA316B                                | snSB00049  | GG | 70  | B35<br>(Donor<br>Parent)         | snSB00042  | TT | 2 |
|                                       | snSB00053  | AA | 115 |                                  | snSB00049  | GG | 2 |
|                                       | snSB00054  | GG | 115 |                                  | snSB00053  | AA | 2 |
|                                       | snSB00072  | AA | 40  |                                  | snSB00054  | GG | 2 |
|                                       | snSB00089  | CC | 115 |                                  | snSB00089  | CC | 2 |
|                                       | snSB00101  | CC | 115 |                                  | snSB00098  | GG | 2 |
|                                       | snSB000102 | AA | 115 |                                  | snSB00101  | CC | 2 |
| NA316C                                | snSB00049  | GG | 92  | Wahi                             | snSB000102 | AA | 2 |
|                                       | snSB00053  | AA | 122 |                                  | snSB00103  | GG | 2 |
|                                       | snSB00054  | GG | 122 |                                  |            |    |   |
|                                       | snSB00072  | AA | 27  |                                  | snSB00049  | GG | 3 |
|                                       | snSB00089  | CC | 122 |                                  | snSB00053  | AA | 3 |
|                                       | snSB00101  | CC | 121 |                                  | snSB00089  | CC | 3 |
|                                       | snSB000102 | AA | 121 |                                  | snSB00101  | CC | 2 |
|                                       |            |    |     |                                  | snSB000102 | AA | 3 |
| NACO Mtama 1<br>(Recurrent<br>parent) | snSB00053  | AA | 3   |                                  |            |    |   |
|                                       | snSB00054  | GG | 3   |                                  |            |    |   |
|                                       | snSB00072  | AA | 3   |                                  |            |    |   |
|                                       | snSB00089  | CC | 3   |                                  |            |    |   |
|                                       | snSB00101  | CC | 3   |                                  |            |    |   |
|                                       | snSB000102 | AA | 3   |                                  |            |    |   |
